# Supplementary material for: Profilin-1 suppresses tumorigenicity in pancreatic cancer through regulation of the SIRT3-HIF1α axis
Source: PubMed Central journal article supplement (PMC4249601; doi:10.1186/1476-4598-13-187), 2014-08-07

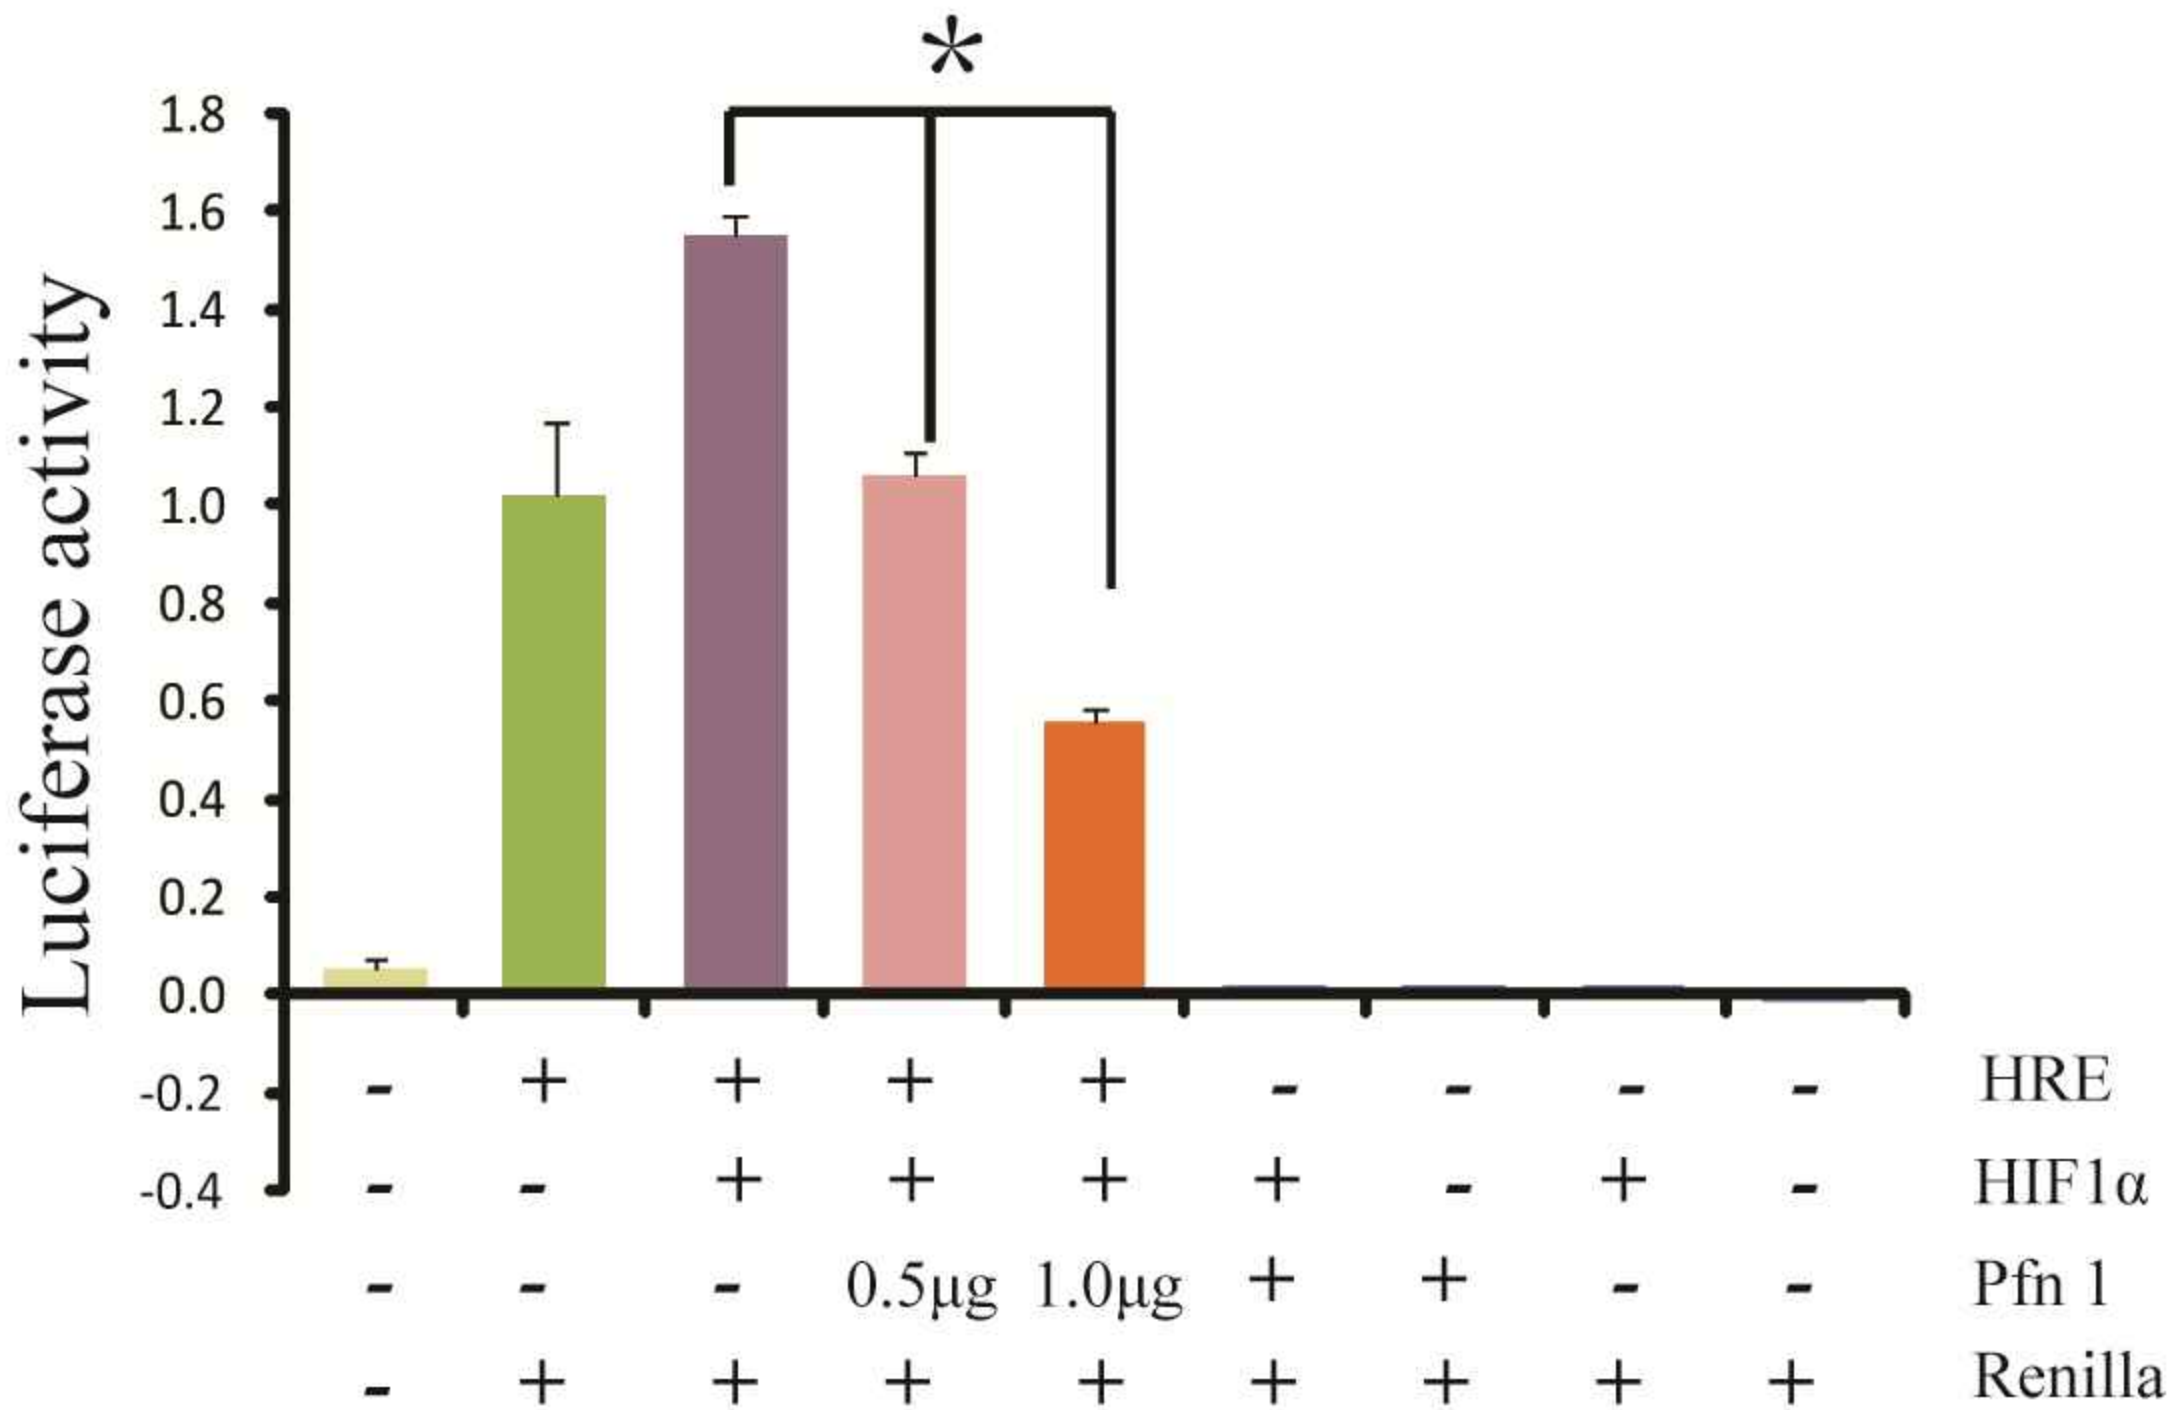

Supplement: 12943_2014_1388_MOESM4_ESM.pdf [file 12943_2014_1388_MOESM4_ESM.pdf]
